# Supplementary figures and images for: Effects of Behavioral Intervention Components for African American/Black and Latino Persons Living with HIV with Non-suppressed Viral Load Levels: Results of an Optimization Trial
Source: Springer Nature journal article supplement (doi:10.1007/s10461-023-04086-0), 2023-05-25

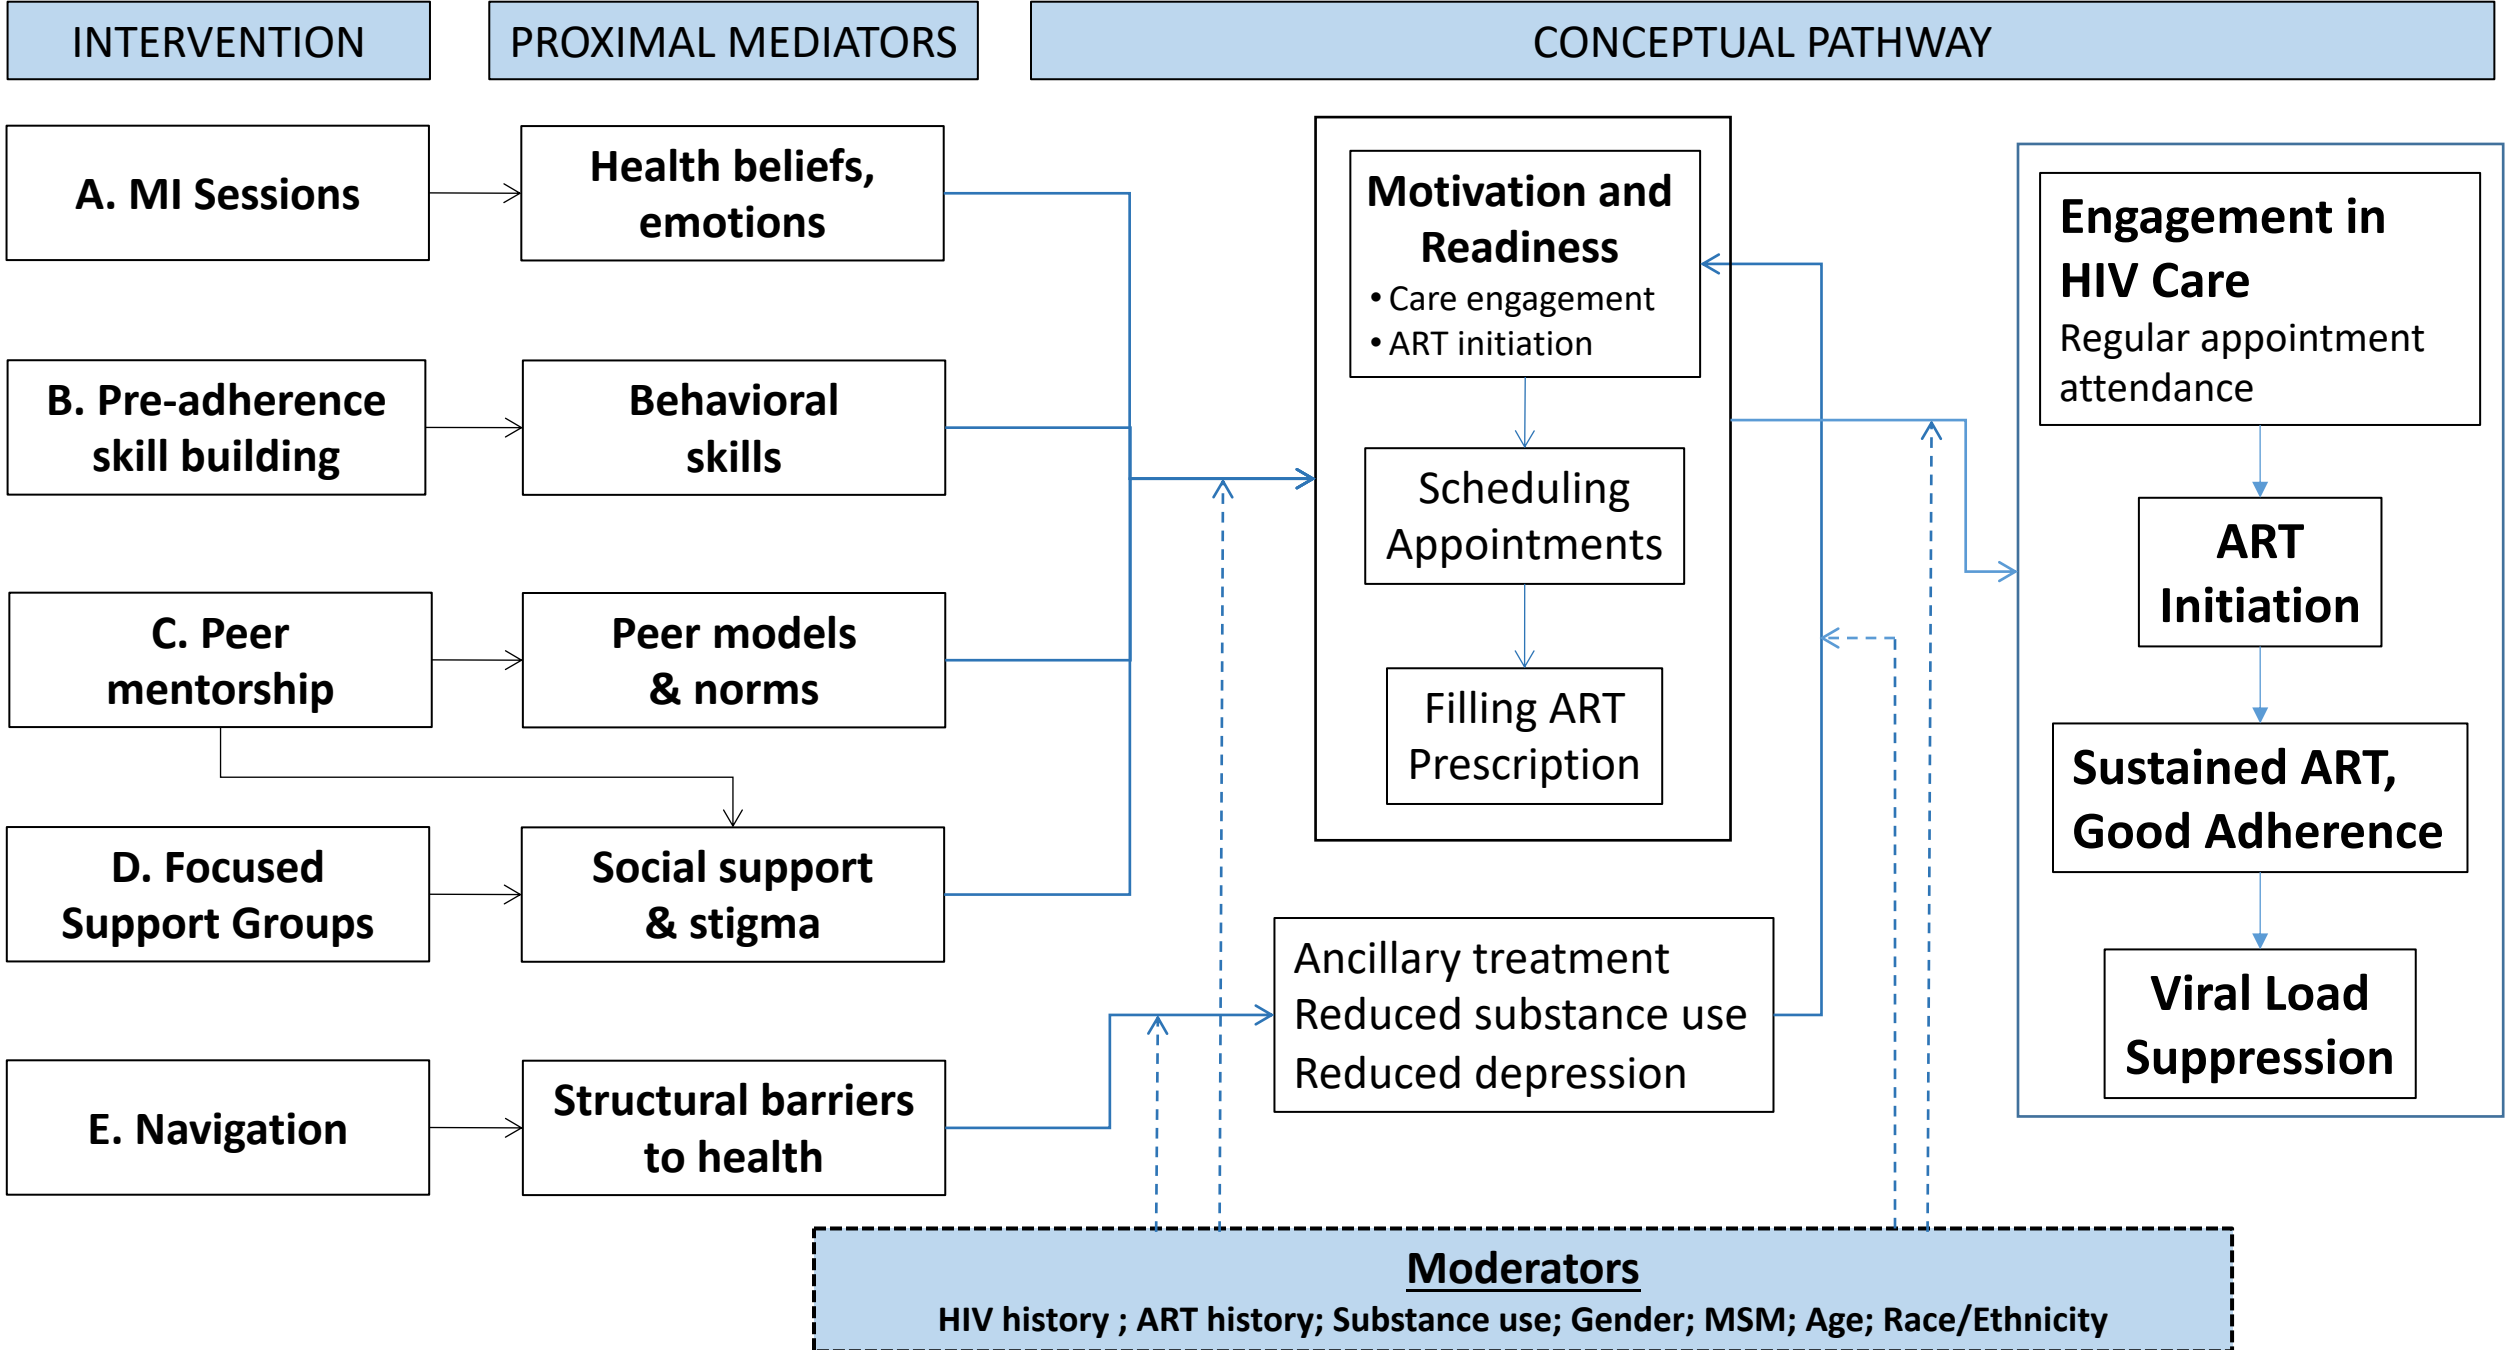

Supplement: MOESM1 [file 10461_2023_4086_MOESM1_ESM.pdf]
